# Supplementary material for: Disease Severity in Moderate-to-Severe COVID-19 Is Associated With Platelet Hyperreactivity and Innate Immune Activation
Source: PubMed Central journal article supplement (PMC8963244; doi:10.3389/fimmu.2022.844701), 2022-03-11
Supplement: DataSheet_1.pdf [file DataSheet_1.pdf]

## Online Supplement

### **Disease severity in moderate-to-severe COVID-19 is associated with platelet hyperreactivity and innate immune activation**

Kai Jakobs<sup>1,2</sup>, Leander Reinshagen<sup>1,2</sup>, Marianna Puccini<sup>1,2</sup>, Julian Friebe<sup>1,2,3</sup>, Anne-Christin Beatrice Wilde<sup>4</sup>, Ayman Alsheik<sup>1</sup>, Andi Rroku<sup>1,2</sup>, Ulf Landmesser<sup>1,2,3</sup>, Arash Haghikia<sup>1,2,3</sup>, Nicolle Kränkel<sup>1,2,†</sup>, Ursula Rauch-Kröhnert<sup>1,2,†</sup>

<sup>1</sup> Charité University Medicine Berlin, Department of Cardiology, Campus Benjamin Franklin, Berlin, Germany

<sup>2</sup> DZHK (German Centre for Cardiovascular Research), Partner Site Berlin, Berlin, Germany

<sup>3</sup> Berlin Institute of Health (BIH), Berlin, Germany

<sup>4</sup> Charité University Medicine Berlin, Department of Hepatology and Gastroenterology, Campus Virchow, Berlin, Germany.

† These authors have contributed equally to this work and share senior authorship

#### **\* Correspondence:**

Ursula Rauch-Kröhnert, Charité - University Medicine Berlin, Berlin, Germany,

[ursula.rauch@charite.de](mailto:ursula.rauch@charite.de)

Nicolle Kränkel, Charité - University Medicine Berlin, Berlin, Germany, [nicolle.kraenkel@charite.de](mailto:nicolle.kraenkel@charite.de)

1 Supplemental Figures

supplemental Figure 1

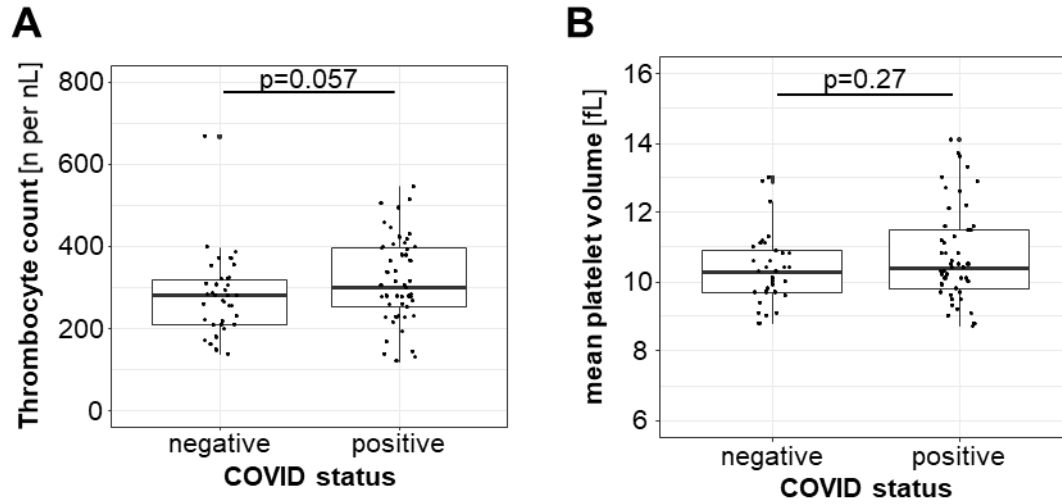

**Supplemental Figure 1:** No significant differences between  $COV^{pos}$  and  $COV^{neg}$  were observed for platelet count (**A**) or MPV (**B**).

## supplemental Figure 2

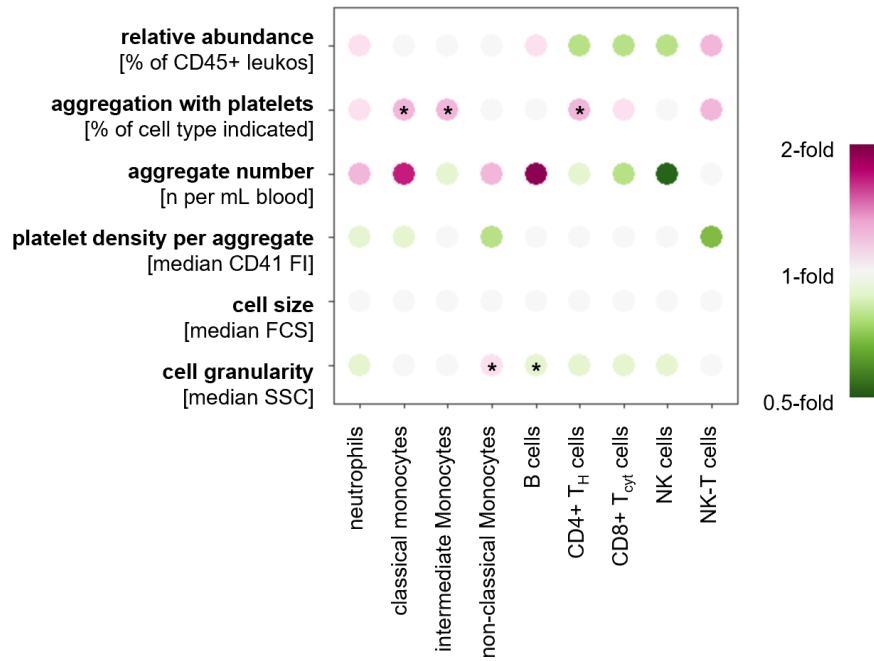

**Supplemental Figure 2:** Bubble plot depicting differences in characteristics of main leukocyte subtypes in COV<sup>pos</sup> patients as compared to COV<sup>neg</sup> patients. Colors indicate level and direction of difference between groups. Parameters with significant differences between groups are marked with

\*

## supplemental Figure 3

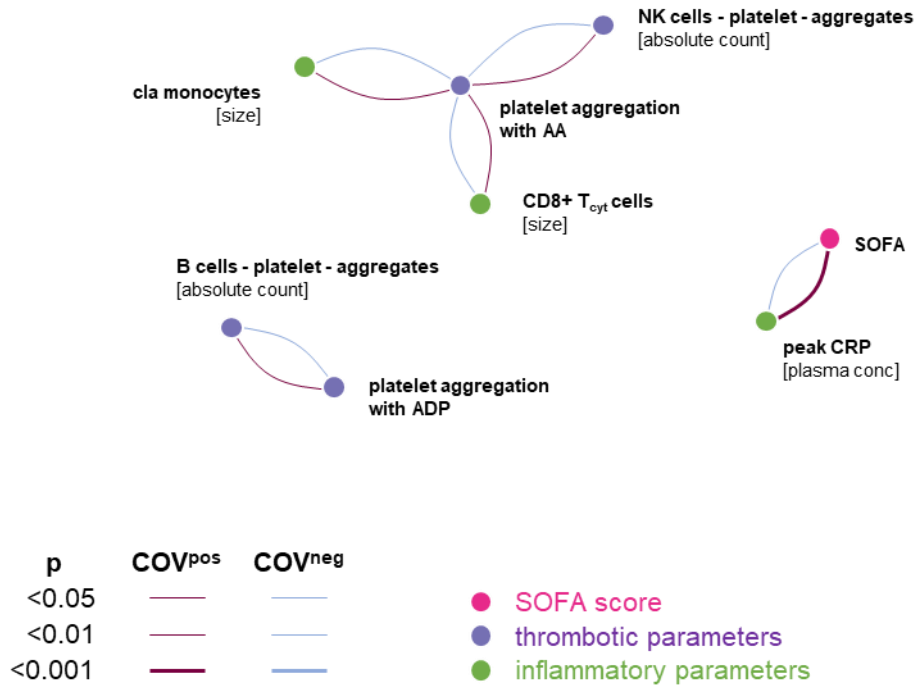

**Supplemental Figure 3:** Correlations observed between parameters in COV<sup>pos</sup> (brown lines) and in COV<sup>neg</sup> (blue lines) patients. Spearman correlations were performed and are depicted for correlations with  $p < 0.05$ . All correlations are  $r > 0$ . No inverse correlations ( $r < 0$ ) were observed between the same parameters in both groups. SOFA score correlates strongly with peak CRP in COV<sup>pos</sup>, but only weakly in the COV<sup>neg</sup> group. cla monocytes: classical monocytes, int monocytes: intermediate monocytes; ncl monocytes: non-classical monocytes, T<sub>H</sub>: T helper cells, T<sub>cyt</sub>: cytotoxic T cells, NK cells: natural killer cells, peak CRP: highest CPR level during hospital stay.
